# Supplementary material for: Metabolic complexity drives divergence in microbial communities
Source: Springer Nature journal article supplement (doi:10.1038/s41559-024-02440-6), 2024-07-02
Supplement: MOESM1 [file 41559_2024_2440_MOESM1_ESM.pdf]

---

# Metabolic complexity drives divergence in microbial communities

---

In the format provided by the authors and unedited

---

# 1 Measuring divergence with the Aitchison distance metric

In our study, we use the Aitchison distance<sup>1</sup> to measure divergence (i.e. the beta-diversity between communities within the same condition) because of its sensitivity to non-overlapping species between communities and its statistical properties with respect to handling compositional data. To illustrate why we chose the Aitchison distance, we will define it alongside other commonly used beta-diversity metrics - Bray-Curtis<sup>2</sup> and Jensen-Shannon Distance (JSD)<sup>3</sup> - and consider the effects of each across different hypothetical scenarios.

## 1.1 Metric definitions

$$\text{Aitchison}(\mathbf{x}, \mathbf{y}) = E(\text{clr}(\mathbf{x}), \text{clr}(\mathbf{y})) = \sqrt{\sum (\text{clr}(\mathbf{x}) - \text{clr}(\mathbf{y}))^2} \quad (1)$$

Where  $E$  is the Euclidean distance,  $\text{clr}$  is the center log ratio transformation  $\text{clr}(\mathbf{x}) = \log \mathbf{x}/G(\mathbf{x})$ , and  $G(\mathbf{x})$  is the geometric mean. A pseudocount of 1 is added to each vector ( $\mathbf{x} + \mathbf{1}$ ) to allow for a meaningful calculation of log transformations and  $G(\mathbf{x})$ . See Section 1.3 for more information about the effect of pseudocounts.

$$\text{Bray-Curtis}(\mathbf{x}, \mathbf{y}) = \frac{\sum |\mathbf{x} - \mathbf{y}|}{\sum |\mathbf{x} + \mathbf{y}|} \quad (2)$$

$$\text{JSD}(\mathbf{x}, \mathbf{y}) = \sqrt{\frac{D(\mathbf{x}||m) + D(\mathbf{y}||m)}{2}} \quad (3)$$

Where  $D$  is the Kullback-Liebler divergence: For distributions  $\mathbf{a}(i)$  and  $\mathbf{b}(i)$ ,  $D(\mathbf{a}(i)||\mathbf{b}(i)) = \sum \mathbf{a}(i) \log \frac{\mathbf{a}(i)}{\mathbf{b}(i)}$ . And where  $m = (\mathbf{x} + \mathbf{y})/2$ .

## 1.2 Simple hypothetical scenarios

To compare these three metrics, we can interpret their results for the following four scenarios. For simplicity's sake we can assume pairs of communities where all taxa that are found in each community are sequenced to equal amounts:

Scenario 1: Entirely non-overlapping communities

C1 : 100. 0. 0. 0. 0. 0. 0. 0. 0. 0.  
C2 : 0. 100. 0. 0. 0. 0. 0. 0. 0. 0.

Scenario 2: Partially overlapping low-diversity communities

C1 : 100. 0. 0. 0. 0. 0. 0. 0. 0. 0.  
C2 : 100. 100. 0. 0. 0. 0. 0. 0. 0. 0.

Scenario 3: Entirely non-overlapping diverse communities

C3 : 100. 100. 100. 100. 100. 0. 0. 0. 0. 0.  
C4 : 0. 0. 0. 0. 0. 100. 100. 100. 100. 100.

Scenario 4: Partially overlapping diverse communities

C3 : 100. 100. 100. 100. 100. 0. 0. 0. 0. 0.  
C4 : 100. 0. 0. 0. 0. 100. 100. 100. 100. 100.

|                                                   | Aitchison | Bray-Curtis | JSD      |
|---------------------------------------------------|-----------|-------------|----------|
| Scenario 1: Non-overlapping, low diversity        | 6.526766  | 1.000000    | 0.832555 |
| Scenario 2: Partially overlapping, low diversity  | 3.263383  | 0.333333    | 0.464501 |
| Scenario 3: Non-overlapping, high diversity       | 14.594293 | 1.000000    | 0.832555 |
| Scenario 4: Partially overlapping, high diversity | 13.768228 | 0.818182    | 0.752880 |

Table 1: **Supplementary Table 1 — Divergence between hypothetical communities using different beta-diversity metrics.** The distances computed in scenarios 1 (non-overlapping taxa) and 2 (partially overlapping taxa) are with low diversity communities (C1, C2, and C3) while distances computed in scenarios 3 (non-overlapping) and 4 (partially overlapping) are with high diversity communities (C4, C5, and C6).

22 These scenarios reveal how each metric is sensitive to overlapping taxa and diversity, but how only the  
23 Aitchison distance detects differences in the special case where no taxa overlap between communities. The  
24 sensitivity to overlapping taxa is clear when comparing scenarios 1 and 2 or when comparing scenarios 3 and  
25 4 - in both cases, all metrics decrease in value when a taxon becomes shared between communities (Scenario 1  
26 > Scenario 2 and Scenario 3 > Scenario 4). The sensitivity to diversity is apparent by comparing scenarios 2  
27 and 4, where all metrics increase in value when more unshared taxa are present in each community (Scenario  
28 4 > Scenario 2). Comparing scenarios 1 and 3 reveals the special case where the diversity of both communities  
29 increases without any overlapping taxa. Here, the value of Bray-Curtis and JSD is unchanged, while Aitchison  
30 interprets this increase in differences between communities as an increase in distance (Scenario 3 > Scenario  
31 1 for Aitchison and Scenario 1 = Scenario 3 for Bray-Curtis and JSD).

32 The Aitchison distance may be best for the scenario in our study, where we are comparing communities  
33 cultured under the same conditions (i.e. divergence). We are precisely interested in the situation in which  
34 communities that may start off similar to each other undergo different assembly processes (including the  
35 selection of entirely non-overlapping taxa) despite growing on the same conditions. With the Aitchison, we  
36 can interpret non-overlapping communities of few species as more similar than non-overlapping communities  
37 of many species, whereas the other distance metrics make no distinction (Scenario 1 versus Scenario 3).  
38 We further discuss the relationship between diversity and the Aitchison distance in the following section,  
39 “Divergence is sensitive to richness and evenness” (Section 2).

40 An additional and critical justification for using the Aitchison distance relates to how it fundamentally  
41 handles “compositionality”, which other dissimilarity metrics (e.g. Bray-Curtis and JSD) cannot address.  
42 As described in “Microbiome Datasets Are Compositional: And This Is Not Optional” by Gloor et al.<sup>4</sup>,  
43 since sequencing data is constrained by the number of “slots” in the sequencer, sequencing reads are non-  
44 independent random samples from a population and all that is effectively being captured during sequencing is  
45 the proportion (or composition) of these reads from the larger population. As a consequence, it is critical to  
46 treat sequencing data with compositional techniques, such as the Aitchison distance, which is the Euclidean  
47 distance between two compositions following centered log-ratio (clr) transformation (Equation 1).

48 As outlined in Gloor et al., ratio transformations between proportions capture the same relationship  
49 between counts of the same data and log transformations of these ratios result in symmetrically distributed  
50 and linearly related data<sup>4</sup>. While information about the true absolute abundance of taxa is lost during  
51 sequencing, ratio transforms provide a framework to compare all taxa to the same reference within a sample.  
52 The centered log-ratio in particular is scale-invariant, meaning that, in principle, this ratio will be the  
53 same regardless of the sample read depth. These properties allow for the proper use of standard statistical  
54 methods on clr-transformed data, ultimately making the Aitchison distance a more appropriate method for  
55 compositional data than other common alternatives.

### 56 1.3 Effect of pseudocount

57 As mentioned in Equation 1, a pseudocount is required to compute the Aitchison distance when non-  
58 overlapping taxa (0 counts) are present to allow for log-based calculations<sup>4</sup>. We added a pseudocount  
59 of 1 to all taxa in each sample, so that 0-count entries for a given sample,  $\mathbf{x}$  became  $\log[1/G(\mathbf{x})]$  following  
60 the clr-transformation. Since in real sequencing samples,  $G(\mathbf{x})$  and most read counts  $\gg 1$ , this transformed  
61 pseudocount value is much smaller than most of the real clr-transformed counts that it is being compared

62 to, and therefore does not introduce any systematic noise into our calculations. When computing divergence  
63 on our communities, we used the union of all taxa detected in our study for each calculation. As a result,  
64 some calculations included instances of computing differences between entries that were each 0-count before  
65 clr-transformation (0-0 pairs). Leaving 0-0 pairs in principle could alter results compared to removing them;  
66 however, we repeated all of our calculations in the manuscript with the alternative approach of removing 0-0  
67 pairs, and we found that all results were nearly identical.

## 68 2 Divergence is sensitive to richness and evenness

69 As shown in **Figure 3**, we observed that communities with higher diversity diverge more from each other.  
70 We were interested in understanding whether this correlation should be expected merely based on (uniform)  
71 random chance or if this results from how species are distributed in natural communities. Here we demon-  
72 strate that the answer is both: our divergence metric (the Aitchison distance) does correlate with richness  
73 (i.e. the number of taxa) and, in addition, skewness (unevenly distributed taxa) causes communities of the  
74 same richness to diverge further. This notion supports the logic we depict in **Figure 4d** where the endemic  
75 (uneven) distribution of specialists contributes to the increased divergence experienced by communities in  
76 more complex conditions.

77 In order to test the relationships between richness, evenness, and divergence, we simulated the divergence  
78 between communities sampled from multinomial distributions<sup>5</sup>. With a multinomial distribution, we can  
79 generate simplified simulated “communities” with  $n$  total counts (akin to sequencing depth) over  $k$  taxa  
80 where each taxon  $i$  has probability  $p_i$ . When we tested the effect of richness on divergence, by sampling  
81 communities with increasing  $k$  under the null assumption that all taxa are equally likely ( $p_i = 1/k$ ), we  
82 found that communities diverge more with increasing richness (**Supplementary Figure S1a**). However,  
83 we know that real communities have a substantially skewed distribution that deviates from the uniform one  
84 used under this null assumption<sup>6</sup>. To best capture the distribution of taxa in nature, we used the distribution  
85 of abundances from one of our source experimental communities with 300 observed taxa (**Supplementary**  
86 **Figure S1b**). Since our post-inoculation communities (from day 3 and onwards) have a richness an order  
87 of magnitude less than our source communities, the following analysis provides a conservative assessment of  
88 the effects of richness on divergence for our post-inoculation communities.

89 To understand how divergence is affected by the distribution of taxa, we generated fifty communities  
90 each from a multinomial distribution parameterized by the real taxonomic abundance distribution of our  
91 representative experimental community (**Supplementary Figure S1b**) and then calculated the divergence  
92 between all pairs of these generated communities. We repeated these two steps to generate another fifty  
93 communities from a uniform distribution with the same richness as our representative community, and  
94 compared the skewed and uniform divergence outcomes (**Supplementary Figure S1c**). We find that even  
95 though these calculations were performed on communities of the same size, the divergence of the skewed  
96 communities is significantly greater than those of the uniformly distributed ones, showing that skewness  
97 contributes to the signal we see in our experiment (**Figure 3-4**). For all of the previous analyses, we fixed  
98  $n = 8,564$ , the “sequencing depth” of our representative experimental community.

99 Even upon taking into account the natural distribution of taxa, the divergence observed for randomly  
100 sampled communities falls short of the divergence experimentally measured across communities in our ex-  
101 periment and simulations. In our experiments, divergence reaches values of  $\sim 20$ -30 for our post-inoculation  
102 communities (**Figure 2**), which is far greater than the mean of the distribution of the skewed distribution  
103 cases ( $\sim 8$ ). Again, our experimental post-inoculation communities diverge this much even though they are  
104 an order of magnitude smaller than our source communities, suggesting that skewness provides a substantial  
105 contribution to divergence in these experimental communities compared to richness. These analyses reveal  
106 how both increased richness (which has shown to be correlated with metabolic complexity<sup>7</sup>) and the un-  
107 even distribution of taxa (as we show) contribute to divergence and how further differences between natural  
108 communities shape their divergence in our experiments.

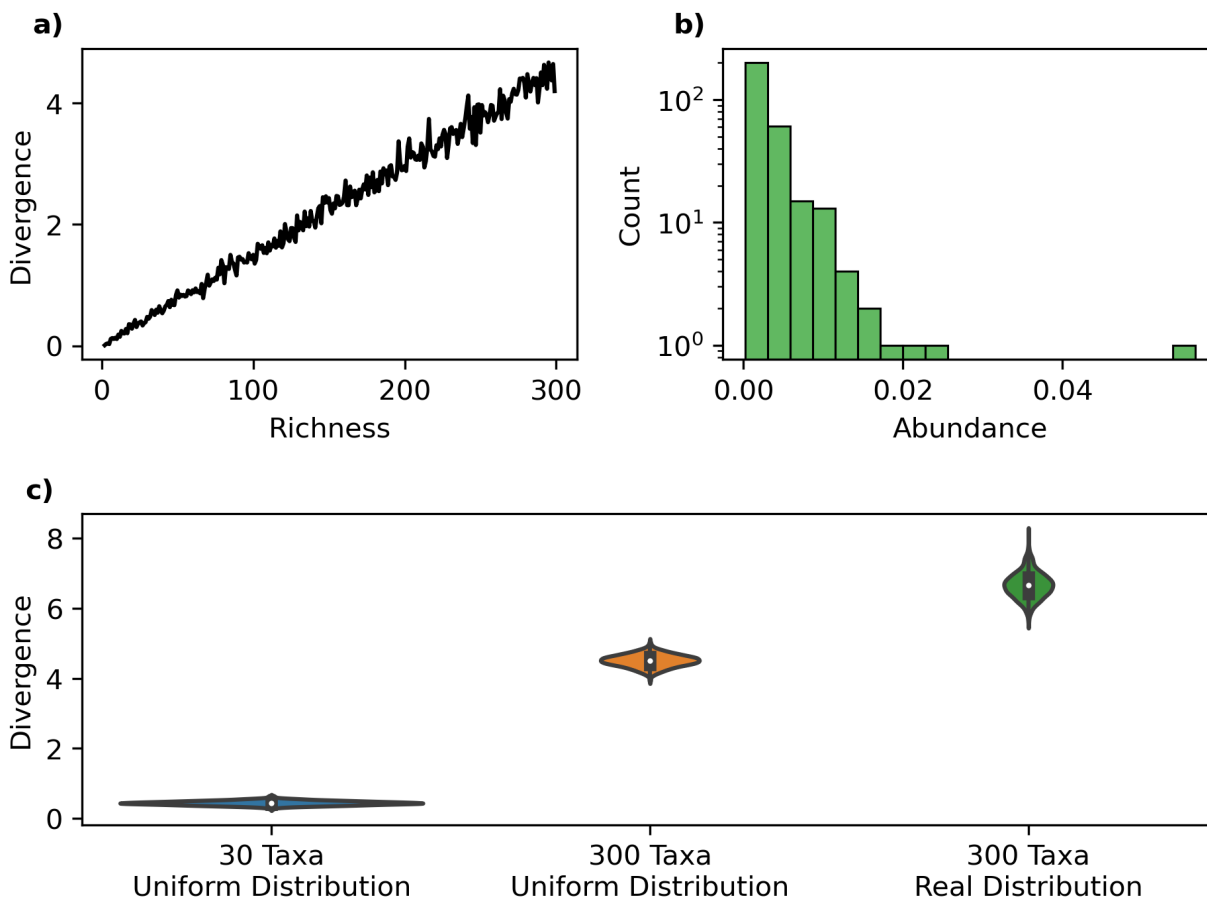

Figure 1: **Supplementary Figure S1 — Divergence is sensitive to richness and evenness.** **a)** The divergence (measured by the Aitchison distance) between two randomly sampled communities of uniformly likely taxa of increasing size (richness). Communities with higher richness diverge more than communities with less. **b)** The (uneven) distribution of taxa abundances from a real community in our study. **c)** The distribution of divergence between fifty simulated communities with (i) 30 uniformly distributed taxa, (ii) 300 uniformly distributed taxa, and (iii) 300 unevenly distributed taxa (following the distribution in **b**). Each violin describes the distribution of pairwise distances between all fifty simulated communities ( $N=1,255$  per violin). Each violin outlines the kernel density estimate and contains a box which is bound by the interquartile range with an open circle at the media and whiskers that extend up to 1.5 times the interquartile range. The increase in divergence between (i) and (ii) shows how divergence is sensitive to richness and the increase in divergence between (ii) and (iii) shows how divergence is then further sensitive to skewness. Note that divergence between our real communities ranges from 20-30, which is far greater than in these simulated communities (**Figure 2**).

### 109 3 Generality of cross-feeding mechanism in our consumer-resource 110 model

#### 111 3.1 Consumer-resource model definition

112 The microbial consumer-resource model (CRM) is a valuable method<sup>8-12</sup> for simulating the dynamics of  
113 complex microbial communities. In this model, consumers uptake resources for growth and in the process  
114 leak some of the resulting transformed byproducts into the environment. In the text below we use the terms  
115 “leakage” to encompass different ways that microbially-transformed metabolites are made available to the

116 environment, including exudation, active and passive secretion, and extracellular degradation. Note also that  
 117 the standard CRMs do not differentiate between costly (ATP-dependent) transport and free diffusion. Cross-  
 118 feeding, where the byproducts of one population’s activity become available to others for consumption<sup>13</sup>,  
 119 emerges from these dynamics. As described in our Methods, our CRM is directly adapted from previous  
 120 work<sup>8</sup> and is defined with the following system of equations,

$$\frac{dN_i}{dt} = N_i \left( \sum_{\alpha} (1-l)c_{i,\alpha}R_{\alpha} - m \right) \quad (4)$$

$$\frac{dR_{\alpha}}{dt} = (R_{\alpha}^0 - R_{\alpha}) - \sum_j N_j c_{j,\alpha} R_{\alpha} + \sum_{j,\beta} N_j c_{j,\beta} R_{\beta} D_{\alpha,\beta} l \quad (5)$$

121 Where  $N_i$  is the abundance of species  $i$ ,  $R$  is the concentration of resource  $\alpha$ ,  $R_{\alpha}^0$  is the resource supply  
 122 concentration,  $l$  is the leakage fraction i.e. how much each resource is “leaked” (how much of  $\alpha$  is converted  
 123 into  $\beta$ , where the rest is converted into biomass),  $m$  is the consumer maintenance cost,  $c_{i,\alpha}$  is the consumer  
 124 preference matrix, and  $D_{\alpha,\beta}$  is the resource transformation matrix describing the rate that  $\beta$  turns into  $\alpha$   
 125 following consumption. In our simulations, we parameterize the  $c$  and  $D$  matrices to represent the trophic  
 126 structure of microbial communities, where groups of taxa consume types of resources (defined by a struc-  
 127 tured  $c$  matrix) and complex resources hierarchically transform into simpler resources following consumption  
 128 (defined by a structured  $D$  matrix).

## 129 3.2 Representations of cross-feeding in CRMs

130 As mentioned in the Results and Discussion sections, an important limitation of this model is the simplified  
 131 formulation of cross-feeding defined by a linear coupling of resource transformation, leakage, and growth. This  
 132 is meant to capture in an idealized way the complexity of metabolism. While this model has been successful  
 133 in reproducing various ecological phenomena<sup>9,10</sup>, it does so at the expense of a detailed and accurate de-  
 134 scription of the many possible ways microbes may interact. The simplified view portrayed by a typical CRM  
 135 encodes (through the  $D$  matrix) a series of possible transformations, implicitly assumed to be unimolecular  
 136 intracellular reactions that convert a given metabolite into different ones, with a rate directly proportional  
 137 to the uptake rate of the substrate<sup>9,11</sup>. We argue here that, despite the simplicity of the original interpre-  
 138 tation, the CRM can be viewed as capturing, in an approximated way, a much broader set of alternative  
 139 cross-feeding mechanisms. While these mechanisms can be very complex and dependent on environmental  
 140 variables that are absent from the model definition, they may be expected to display on average a behavior  
 141 that is consistent with the CRM formalism.

142 Cross-feeding can be mediated by a large assortment of molecules that can be produced, secreted, ex-  
 143 changed, imported, or extracellularly modified through a variety of mechanisms<sup>13</sup>. We focus below on three  
 144 specific processes that are known to mediate metabolic cross-feeding: extracellular degradation, fermenta-  
 145 tion, and stress-induced cross-feeding. While the biochemical mechanisms underlying these processes are  
 146 not explicitly described with the CRM formalism, their overall phenomenological outcome (i.e. consumption  
 147 of an incoming metabolite and production of an outgoing resource) is reasonably captured by the standard  
 148 metabolite transformation term ( $N_j c_{j,\beta} R_{\beta} D_{\alpha,\beta} l$ ) of the CRM, where the net outcome can be approximately  
 149 described with an outgoing byproduct production that is proportional to biomass and substrate amount.  
 150 Therefore for the purpose of interpreting our data, we posit that the microbial consumer resource model  
 151 with trophic structure can sufficiently approximate cross-feeding dynamics as measured in real complex  
 152 communities.

153 Below, we examine how the metabolite transformation term,  $N_j c_{j,\beta} R_{\beta} D_{\alpha,\beta} l$ , relates to the availability of  
 154 the leaked metabolites ( $dR_{\alpha}/dt$ ) in fermentation, extracellular degradation, and stress-induced cross-feeding  
 155 and then summarize these details in **Supplementary Table 2**.

### 156 3.2.1 Fermentation

157 With fermentation, sugars imported by the cell for ATP production are not fully metabolized to  $\text{CO}_2$  (as  
 158 is the case with respiration), but rather result in the production and secretion of (“simpler”) organic acid  
 159 byproducts ( $D_{\alpha,\beta}$ ) which can then be secreted and made available to other community members. Different

160 organisms are capable of fermenting different sugars ( $c_{j,\beta}$ )<sup>14</sup> resulting in a diversity of byproducts. The  
161 net amount of byproducts secreted during fermentation ( $l, R_\alpha$ )<sup>15,16</sup> and the amount of microbial biomass  
162 ( $N_i$ )<sup>17</sup> generally correlate with the amount of sugar present in the environment ( $R_\beta$ ). Therefore we expect  
163 that secretions due to fermentation and the subsequent cross-feeding that emerges are phenomenologically  
164 captured as a potential avenue for metabolic interdependence in our model.

165 We should note that the extent of fermentation vs. respiration often depends on the availability of oxygen,  
166 a metabolic detail that is missing in CRMs. For the purpose of the present work, it is reasonable to assume  
167 that oxygen is somehow limiting both in our experimental setup and in the natural soil from which the  
168 microbial samples are extracted, and that a certain degree of fermentation is pervasive in the communities<sup>18</sup>.  
169 We don't expect the details of which microbes secrete what specific byproduct under a certain level of oxygen  
170 to be relevant for the conclusions of our work, but this is still a fundamental limitation of CRM that may  
171 be addressed in future models.

### 172 3.2.2 Extracellular degradation

173 Bacteria produce a diverse set of extracellular enzymes<sup>19,20</sup> to degrade polymers (e.g. cellulose) that are  
174 too large to be directly imported. The extracellular activity of these enzymes, which are often attached  
175 to, or found in the vicinity of the producing cell, lead to the environmental release ( $l$ ) of simpler products  
176 (e.g. monosaccharides), which constitute common goods, available for import and utilization by surrounding  
177 microbes ( $c_{j,\beta}$ )<sup>13</sup>. Significant portions of the liberated byproducts can be utilized by individual taxa that  
178 do not participate in the production of relevant extracellular enzymes (including "cheaters", which consume  
179 byproducts without contributing to enzyme production). The effective massive loss of substrate (i.e. the  
180 fact that cellulose is not directly used by the enzyme producer) can be encoded in a large  $l$  parameter of  
181 our model. One can view this process as an overall transformation of a given compound (e.g., cellulose) by  
182 a given organism into a simpler product (e.g. glucose) usable by other organisms, hence giving rise to a  
183 particular case of cross-feeding.

184 In our model, for this specific subset of metabolic processes,  $c_{j,\beta}$  can be interpreted as representing  
185 the extent to which organism  $j$  can produce extracellular enzymes that degrade molecule  $\beta$ ,  $D_{\alpha,\beta}$  represents  
186 the extent to which complex polymers  $\beta$  is transformed into simpler molecule  $\alpha$ ,  $l$  represents the fraction of  
187 degraded byproducts that are available to other community members,  $m$  represents the cost of producing  
188 extracellular enzymes, growth is proportional to the amount of consumed resource, and cross-feeding is  
189 proportional to the size of the degrader population and the leakage fraction.

190 Note that in our implementation of the CRM we do not explicitly distinguish between intracellular and  
191 extracellular catabolism, but rather encodes an overall hierarchy of molecular structures. What matters for  
192 the purpose of our analysis is that the diversity of cross-feeding processes (intracellular and extracellular)  
193 likely occurring in our experimental communities can be captured simultaneously in an approximated way  
194 by our CRM.

### 195 3.2.3 Stress-induced

196 While cross-feeding is typically thought of as a process associated with metabolism during active (typically  
197 exponential) growth (ex. organic acid secretion in fermentation and the availability of extracellular degra-  
198 dation byproducts), it can also emerge as a means for non-growing cells to modify the environment. One  
199 example is acid stress-induced cross-feeding, where a growth-arrested population experiencing acid stress  
200 consumes the acid in its environment and then secretes many of the resulting central carbon metabolic inter-  
201 mediates without growing<sup>21</sup>. In particular, one study found that one organism facing acid stress converted  
202 acetate into other simple metabolites such as pyruvate, lactate, and glutamate as secreted byproducts<sup>21</sup>. In  
203 this way, the stressed population detoxifies its environment and a significant amount of cross-feeding emerges  
204 without the consumer harnessing energy or performing biosynthesis.

205 Despite the complex and subtle mechanisms involved in this stress-induced cross-feeding phenomenon,  
206 it is possible to think of our model as encoding in an approximate way the overall net transformation of  
207 environmental metabolites. Our model represents the consumption of specific acids with  $c_{j,\beta}$ , the transfor-  
208 mation into byproducts with  $D_{\alpha,\beta}$  with leakage  $l$  (which can approach 100% of the incoming substrate if cells  
209 are not growing at all) that is proportional to population size  $N_i$  even if these populations are not actively  
210 growing. We have constructed our  $D_{\alpha,\beta}$  matrix such that most of a resource is transformed into a simpler

211 molecule, but a significant transformation among molecules of comparable complexity (e.g. acetate to lac-  
 212 tate, as seen in the above example) is also allowed (see off-diagonal components of D matrix in **Extended**  
 213 **Data Fig. 7a**). While the detoxifying population does not grow while secreting byproducts, over time  
 214 larger populations will secrete more byproducts than smaller ones, so we would expect that our model still  
 215 captures the proportional relationship between resource transformation, leakage, and population size ( $N_i$ )  
 216 under stress-induced cross-feeding conditions. An important difference between stress-induced cross-feeding  
 217 and the other mechanisms we describe is that in the stress-induced case, secretions may specifically occur  
 218 only once the cells stop growing - a feature that is not currently captured by the CRM.

219 As with the other categories of cross-feeding mechanisms outlined above, our CRM does not explicitly  
 220 distinguish between specific mechanisms, but rather serves as a generalized model that broadly captures each  
 221 of these possibilities.

| Variable | Fermentation                                | Extracellular                                               | Stress-induced                     |
|----------|---------------------------------------------|-------------------------------------------------------------|------------------------------------|
| c        | Sugar preference                            | Polymer preference                                          | Acid preference                    |
| D        | Feasible transformations into organic acids | Possible degradation byproducts                             | Producible metabolic intermediates |
| l        | Degree of fermentation byproduct leakage    | Amount of extracellular degradation products made available | Amount of byproduct secretion      |

Table 2: **Supplementary Table 2 — Representations of cross-feeding mechanisms in the microbial consumer resource model.**

## 222 4 References

- 223 1. Aitchison, J., Barcelo-Vidal, C., Martín-Fernandez, J. A. & Pawlowsky-Glahn, V. Logratio Analysis and  
 224 Compositional Distance. *Math. Geol.* (2000).
- 225 2. Bray, J. R. & Curtis, J. T. An Ordination of the Upland Forest Communities of Southern Wisconsin.  
 226 *Ecol. Monogr.* 27, 325–349 (1957).
- 227 3. Lin, J. Divergence measures based on the Shannon entropy. *IEEE Trans. Inf. Theory* 37, 145–151  
 228 (1991).
- 229 4. Gloor, G. B., Macklaim, J. M., Pawlowsky-Glahn, V. & Egozcue, J. J. Microbiome Datasets Are  
 230 Compositional: And This Is Not Optional. *Front. Microbiol.* 8, 2224 (2017). 5. Egozcue, J. J., Graffelman,  
 231 J., Ortego, M. I. & Pawlowsky-Glahn, V. Some thoughts on counts in sequencing studies. *NAR Genomics*  
 232 *Bioinforma.* 2, (2020).
- 233 6. Grilli, J. Macroecological laws describe variation and diversity in microbial communities. *Nat. Commun.* 11, 4743 (2020).
- 235 7. Dal Bello, M., Lee, H., Goyal, A. & Gore, J. Resource–diversity relationships in bacterial communities  
 236 reflect the network structure of microbial metabolism. *Nat. Ecol. Evol.* 5, 1424–1434 (2021).
- 237 8. Marsland, R. et al. Available energy fluxes drive a transition in the diversity, stability, and functional  
 238 structure of microbial communities. *PLOS Comput. Biol.* 15, e1006793 (2019).
- 239 9. Marsland, R., Cui, W. & Mehta, P. A minimal model for microbial biodiversity can reproduce  
 240 experimentally observed ecological patterns. *Sci. Rep.* 10, 3308 (2020).
- 241 10. Cui, W., Marsland, R. & Mehta, P. Diverse communities behave like typical random ecosystems.  
 242 *Phys. Rev. E* 104, 034416 (2021).
- 243 11. Goldford, J. E. et al. Emergent simplicity in microbial community assembly. 7 (2018). 12. Diaz-  
 244 Colunga, J. et al. Top-down and bottom-up cohesiveness in microbial community coalescence. *Proc. Natl.*  
 245 *Acad. Sci.* 119, e2111261119 (2022).
- 246 13. Fritts, R. K., McCully, A. L. & McKinlay, J. B. Extracellular Metabolism Sets the Table for Microbial  
 247 Cross-Feeding. *Microbiol. Mol. Biol. Rev.* 85, (2021).
- 248 14. Palframan, R. J., Gibson, G. R., Rastall, R. A. & Vriers, D. Carbohydrate Preferences of Bifidobacterium  
 249 Species-Isolated from the Human Gut.



- 250 15. Zentou, H. et al. A New Model of Alcoholic Fermentation under a Byproduct Inhibitory Effect. ACS  
251 Omega 6, 4137–4146 (2021).
- 252 16. Grau, F. H. End Products of Glucose Fermentation by *Brochothrix thermosphacta*. Appl. Environ.  
253 Microbiol. 45, 84–90 (1983).
- 254 17. Reischke, S., Rousk, J. & Bååth, E. The effects of glucose loading rates on bacterial and fungal  
255 growth in soil. Soil Biol. Biochem. 70, 88–95 (2014). 18. Tiedje, J., Sexstone, A., Parkin, T. & Revsbech,  
256 N. Anaerobic processes in soil. Plant Soil 76, 197–212 (1984).
- 257 19. Zimmerman, A. E., Martiny, A. C. & Allison, S. D. Microdiversity of extracellular enzyme genes  
258 among sequenced prokaryotic genomes. ISME J. 7, 1187–1199 (2013).
- 259 20. Berlemont, R. & Martiny, A. C. Phylogenetic Distribution of Potential Cellulases in Bacteria. Appl.  
260 Environ. Microbiol. 79, 1545–1554 (2013).
- 261 21. Amarnath, K. et al. Stress-induced metabolic exchanges between complementary bacterial types  
262 underly a dynamic mechanism of inter-species stress resistance. Nat. Commun. 14, 3165 (2023).
